# Supplementary material for: Meteorological Determinants of Suicide Rates: Evidence from Population-Based Data
Source: Research Square preprint supplement (doi:10.21203/rs.3.rs-8528794/v1), 2026-01-23
Supplement: Supplementary file 1 [file 801dd7a33f79bfb3f158221f.docx]

Supplementary 1. Correlations between meteorological parameters and the daily number of suicides in the city of Katowice (Spearman’s rank correlations, *p* < 0.05

| **Variable** | **Total suicides** | **Completed suicides** | **Attepmpts** | **Female** | **Male** | **Age 19-24 yrs** | **Age 25-34 yrs** | **Age 35-54 yrs** | **Age 55-64 yrs** | **Age 65+ yrs** |
| --- | --- | --- | --- | --- | --- | --- | --- | --- | --- | --- |
| Max. temperature | 0,007 | 0,010 | -0,005 | 0,050 | -0,039 | -0,015 | -0,026 | 0,038 | -0,079 | 0,009 |
| Min. temperature | 0,056 | 0,068 | 0,012 | 0,068 | 0,008 | 0,008 | 0,003 | 0,059 | -0,046 | 0,040 |
| Mean temperature | 0,026 | 0,029 | 0,006 | 0,053 | -0,018 | -0,006 | -0,015 | 0,047 | -0,069 | 0,024 |
| Precipitation [mm] | 0,018 | 0,045 | -0,029 | -0,052 | 0,061 | 0,007 | -0,043 | 0,039 | 0,040 | 0,014 |
| Sunshine [h] | 0,024 | -0,041 | 0,055 | 0,091 | -0,032 | -0,019 | 0,030 | 0,038 | -0,091 | -0,021 |
| Rain [h] | -0,011 | 0,013 | -0,036 | -0,055 | 0,025 | -0,009 | -0,055 | 0,039 | 0,017 | -0,043 |
| Snow [h] | -0,036 | 0,029 | -0,064 | -0,067 | -0,001 | -0,007 | 0,005 | -0,065 | 0,060 | 0,016 |
| Sleet [h] | -0,054 | -0,059 | -0,022 | -0,049 | -0,030 | -0,029 | 0,014 | -0,061 | -0,027 | -0,025 |
| Hail [h] | -0,035 | -0,023 | -0,026 | -0,019 | -0,029 | -0,011 | -0,019 | -0,023 | -0,010 | -0,010 |
| Total precipitation time [h] | -0,017 | 0,045 | -0,065 | -0,096 | 0,043 | -0,005 | -0,041 | 0,018 | 0,037 | -0,014 |
| Fog [h] | -0,063 | -0,067 | -0,031 | -0,085 | -0,017 | -0,050 | 0,036 | -0,106* | 0,023 | -0,043 |
| Mist [h] | -0,089 | -0,052 | -0,098 | -0,097 | -0,026 | 0,048 | 0,022 | -0,191* | 0,002 | 0,030 |
| Haze [h] | -0,008 | 0,036 | -0,046 | -0,033 | 0,013 | -0,019 | -0,033 | -0,041 | -0,018 | 0,150* |
| Wind >15 [m/s] | 0,046 | 0,005 | 0,044 | 0,024 | 0,033 | -0,026 | 0,024 | 0,062 | -0,025 | -0,023 |
| Thunderstorm [h] | -0,008 | 0,033 | -0,028 | 0,076 | -0,072 | -0,049 | -0,045 | 0,060 | -0,046 | 0,032 |
| Lightning [0/1] | 0,033 | 0,029 | 0,013 | -0,035 | 0,063 | -0,021 | -0,035 | 0,025 | -0,020 | 0,139* |
| Average cloud cover [okt] | -0,022 | 0,045 | -0,061 | -0,081 | 0,023 | -0,039 | 0,004 | -0,038 | 0,069 | 0,007 |
| Mean wind [m/s] | 0,026 | 0,074 | -0,036 | -0,007 | 0,020 | -0,080 | 0,003 | 0,093 | -0,034 | -0,040 |
| Station-level pressure [hPa] | -0,010 | -0,043 | 0,018 | 0,073 | -0,061 | 0,009 | 0,037 | -0,090 | 0,026 | -0,004 |
| Sea-level pressure [hPa] | -0,008 | -0,044 | 0,021 | 0,065 | -0,052 | 0,015 | 0,043 | -0,095 | 0,035 | -0,012 |

* Statistically significant correlations (p < 0.05)

Supplementary 2. Correlations between meteorological parameters and the daily number of suicides in the city of Łódź (Spearman’s rank correlations, *p* < 0.05)

| Variable | **Total suicides** | **Completed suicides** | **Attempts** | **Women** | **Men** | **Age 19-24 yrs** | **Age 25-34 yrs** | **Age 35-54 yrs** | **Age 55-64 yrs** | **Age 65+ yrs** |
| --- | --- | --- | --- | --- | --- | --- | --- | --- | --- | --- |
| Max. temperature | 0,059 | 0,035 | 0,046 | 0,080 | 0,026 | -0,061 | 0,053 | 0,055 | 0,130* | 0,021 |
| Min. temperature | 0,058 | 0,000 | 0,053 | 0,058 | 0,037 | -0,048 | 0,051 | 0,054 | 0,124* | 0,051 |
| Mean temperature | 0,055 | 0,021 | 0,044 | 0,074 | 0,025 | -0,056 | 0,042 | 0,057 | 0,132* | 0,033 |
| Precipitation [mm] | 0,066 | -0,015 | 0,075 | -0,009 | 0,076 | -0,031 | 0,077 | 0,118* | -0,035 | -0,009 |
| Sunshine [h] | 0,044 | 0,051 | 0,032 | 0,046 | 0,032 | -0,020 | -0,006 | 0,053 | 0,126* | -0,029 |
| Rain [h] | 0,024 | -0,015 | 0,030 | -0,046 | 0,047 | -0,047 | 0,000 | 0,108* | -0,075 | 0,043 |
| Snow [h] | -0,002 | -0,051 | 0,016 | -0,017 | -0,005 | 0,024 | 0,077 | -0,071 | -0,048 | -0,008 |
| Sleet [h] | -0,064 | -0,031 | -0,066 | -0,065 | -0,051 | 0,011 | 0,065 | -0,114* | -0,072 | 0,003 |
| Hail [h] | 0,023 | 0,018 | 0,015 | -0,053 | 0,067 | -0,051 | 0,033 | 0,122* | -0,042 | -0,040 |
| Total precipitation time [h] | 0,002 | -0,034 | 0,016 | -0,058 | 0,029 | -0,026 | -0,006 | 0,057 | -0,085 | 0,038 |
| Fog [h] | -0,073 | -0,046 | -0,075 | -0,060 | -0,040 | 0,008 | 0,024 | -0,063 | -0,124* | -0,016 |
| Mist [h] | -0,062 | -0,031 | -0,064 | -0,106* | -0,019 | -0,017 | 0,016 | -0,032 | -0,125* | 0,012 |
| Haze [h] | 0,079 | -0,035 | 0,092 | 0,034 | 0,058 | 0,072 | 0,024 | 0,007 | -0,030 | 0,082 |
| Wind >15 [m/s] | 0,030 | -0,025 | 0,043 | -0,048 | 0,066 | -0,025 | -0,035 | 0,090 | -0,021 | -0,020 |
| Thunderstorm [h] | 0,006 | -0,036 | 0,021 | -0,018 | 0,012 | -0,070 | -0,010 | 0,036 | 0,059 | -0,001 |
| Lightning [0/1] | 0,026 | 0,017 | 0,016 | -0,009 | 0,045 | -0,051 | 0,086 | -0,036 | 0,044 | -0,040 |
| Average cloud cover [okt] | -0,039 | -0,098 | -0,021 | -0,046 | -0,018 | -0,040 | 0,019 | -0,006 | -0,067 | 0,027 |
| Mean wind [m/s] | 0,093 | -0,027 | 0,101 | 0,076 | 0,052 | 0,071 | 0,065 | 0,023 | 0,009 | -0,014 |
| Station-level pressure [hPa] | -0,060 | 0,090 | -0,091 | -0,105* | -0,009 | 0,013 | -0,106* | -0,046 | 0,029 | -0,049 |
| Sea-level pressure [hPa] | -0,060 | 0,091 | -0,091 | -0,111* | -0,006 | 0,017 | -0,106* | -0,044 | 0,019 | -0,050 |

* Statistically significant correlations (p < 0.05)

Supplementary 3. Correlations between meteorological parameters and the daily number of suicides in the city of Gdańsk (Spearman’s rank correlations, *p* < 0.05)

| Variable | **Total suicides** | **Completed suicides** | **Attempts** | **Women** | **Men** | **Age 19-24 yrs** | **Age 25-34 yrs** | **Age 35-54 yrs** | **Age 55-64 yrs** | **Age 65+ yrs** |
| --- | --- | --- | --- | --- | --- | --- | --- | --- | --- | --- |
| Max. temperature | -0,130* | -0,087 | -0,115* | -0,067 | -0,133* | -0,022 | -0,092 | -0,102 | 0,031 | -0,062 |
| Min. temperature | -0,185* | -0,137* | -0,136* | -0,096 | -0,178* | -0,063 | -0,101 | -0,086 | 0,006 | -0,108* |
| Mean temperature | -0,157* | -0,111* | -0,128* | -0,078 | -0,158* | -0,045 | -0,102 | -0,092 | 0,021 | -0,088 |
| Precipitation [mm] | 0,046 | 0,023 | 0,066 | 0,017 | 0,042 | 0,003 | 0,106* | 0,066 | 0,031 | -0,065 |
| Sunshine [h] | -0,061 | 0,000 | -0,126* | -0,017 | -0,076 | -0,003 | -0,088 | -0,065 | 0,021 | -0,005 |
| Rain [h] | 0,048 | -0,005 | 0,088 | -0,008 | 0,056 | 0,024 | 0,172* | 0,051 | -0,046 | -0,078 |
| Snow [h] | 0,079 | 0,115* | 0,015 | 0,034 | 0,076 | 0,050 | -0,077 | 0,171* | 0,001 | 0,061 |
| Sleet [h] | 0,130* | 0,133* | 0,097 | 0,118* | 0,090 | 0,042 | 0,071 | 0,105* | 0,045 | 0,021 |
| Hail [h] | -0,028 | -0,023 | -0,015 | -0,014 | -0,024 | -0,010 | -0,013 | -0,015 | -0,009 | -0,012 |
| Total precipitation time [h] | 0,077 | 0,041 | 0,093 | 0,025 | 0,080 | 0,035 | 0,144* | 0,109* | -0,035 | -0,051 |
| Fog [h] | 0,018 | 0,022 | -0,015 | 0,005 | 0,005 | 0,028 | -0,089 | -0,007 | 0,087 | 0,037 |
| Mist [h] | 0,010 | -0,014 | 0,012 | 0,012 | 0,020 | 0,025 | -0,067 | -0,011 | 0,060 | 0,016 |
| Haze [h] | 0,093 | 0,117* | -0,015 | -0,014 | 0,111* | -0,010 | -0,013 | 0,188* | -0,009 | -0,012 |
| Wind >15 [m/s] | 0,106* | 0,077 | 0,074 | -0,035 | 0,124* | 0,030 | 0,109* | 0,090 | -0,068 | 0,032 |
| Thunderstorm [h] | 0,068 | 0,085 | -0,026 | 0,030 | 0,070 | 0,021 | 0,043 | 0,023 | 0,026 | 0,054 |
| Lightning [0/1] | 0,037 | 0,041 | 0,087 | -0,024 | 0,050 | -0,017 | -0,022 | 0,092 | 0,161* | -0,020 |
| Average cloud cover [okt] | 0,002 | -0,029 | 0,055 | -0,012 | 0,008 | -0,024 | 0,071 | 0,028 | 0,005 | -0,042 |
| Mean wind [m/s] | 0,129* | 0,085 | 0,103 | -0,030 | 0,146* | 0,045 | 0,136* | 0,074 | -0,054 | 0,039 |
| Station-level pressure [hPa] | -0,048 | 0,027 | -0,122* | -0,009 | -0,054 | 0,020 | -0,100 | -0,017 | -0,064 | 0,047 |
| Sea-level pressure [hPa] | -0,048 | 0,027 | -0,122* | -0,008 | -0,053 | 0,021 | -0,100 | -0,017 | -0,065 | 0,047 |

* Statistically significant correlations (p < 0.05)

Supplementary 4. Correlations between meteorological parameters and the daily number of suicides in the city of Białystok (Spearman’s rank correlations, *p* < 0.05

| Variable | **Total suicides** | **Completed suicides** | **Attempts** | **Women** | **Men** | **Age 19-24 yrs** | **Age 25-34 yrs** | **Age 35-54 yrs** | **Age 55-64 yrs** | **Age 65+ yrs** |
| --- | --- | --- | --- | --- | --- | --- | --- | --- | --- | --- |
| Max. temperature | -0,042 | -0,071 | 0,000 | 0,090 | -0,133* | -0,019 | -0,007 | -0,036 | 0,038 | -0,014 |
| Min. temperature | -0,037 | -0,075 | 0,001 | 0,078 | -0,129* | -0,022 | 0,030 | -0,077 | 0,026 | -0,011 |
| Mean temperature | -0,037 | -0,077 | 0,009 | 0,090 | -0,129* | -0,013 | 0,001 | -0,042 | 0,023 | -0,003 |
| Precipitation [mm] | -0,107* | -0,097 | -0,058 | 0,047 | -0,141* | -0,015 | -0,023 | -0,097 | -0,068 | -0,038 |
| Sunshine [h] | -0,013 | -0,015 | -0,002 | 0,054 | -0,074 | -0,021 | -0,075 | 0,028 | 0,055 | 0,033 |
| Rain [h] | 0,001 | -0,021 | 0,002 | 0,046 | -0,032 | 0,006 | 0,089 | -0,010 | -0,036 | -0,005 |
| Snow [h] | -0,008 | -0,032 | 0,020 | -0,054 | 0,054 | 0,011 | -0,006 | -0,028 | 0,039 | -0,027 |
| Sleet [h] | -0,033 | -0,086 | 0,009 | -0,018 | -0,020 | -0,009 | -0,017 | -0,019 | 0,012 | -0,059 |
| Hail [h] | 0,083 | -0,037 | 0,107* | 0,032 | 0,105* | 0,087 | 0,200* | 0,039 | -0,021 | -0,026 |
| Total precipitation time [h] | 0,012 | -0,001 | 0,014 | 0,034 | 0,016 | 0,025 | 0,081 | -0,019 | -0,022 | -0,014 |
| Fog [h] | -0,006 | -0,080 | 0,028 | 0,027 | -0,033 | 0,019 | -0,029 | 0,069 | -0,033 | -0,024 |
| Mist [h] | -0,006 | 0,028 | -0,033 | -0,018 | 0,018 | -0,008 | -0,047 | 0,063 | -0,053 | 0,063 |
| Haze [h] | -0,017 | -0,032 | -0,001 | -0,041 | 0,010 | -0,022 | -0,034 | 0,057 | -0,018 | -0,022 |
| Wind >15 [m/s] | -0,062 | -0,066 | -0,035 | 0,037 | -0,119* | -0,070 | -0,007 | -0,008 | -0,056 | -0,026 |
| Thunderstorm [h] | 0,012 | -0,037 | 0,034 | 0,020 | -0,008 | -0,026 | 0,120* | -0,039 | -0,021 | -0,026 |
| Lightning [0/1] | 0,023 | -0,004 | 0,026 | 0,006 | 0,045 | 0,027 | 0,088 | -0,048 | -0,064 | -0,021 |
| Average cloud cover [okt] | 0,018 | -0,001 | 0,015 | -0,037 | 0,055 | 0,056 | -0,030 | 0,026 | -0,074 | 0,019 |
| Mean wind [m/s] | 0,064 | 0,060 | 0,027 | 0,015 | 0,058 | 0,056 | -0,018 | 0,077 | 0,034 | -0,008 |
| Station-level pressure [hPa] | 0,065 | 0,069 | 0,023 | 0,010 | 0,065 | 0,056 | -0,022 | 0,078 | 0,037 | -0,009 |

* Statistically significant correlations (p < 0.05)

Supplementary 5 Correlations between average weather parameters and the 10-day cumulative number of suicides in Białystok (Spearman’s rank correlation, p < 0.05)

| **Variable** | **Total suicides** | **Completed** | **Attempts** | **Women** | **Men** | **Age 19-24 yrs** | **Age 25-34 yrs** | **Age 35-54 yrs** | **Age 55-64 yrs** | **Age 65+ yrs** |
| --- | --- | --- | --- | --- | --- | --- | --- | --- | --- | --- |
| Max. temperature | -0,003 | -0,076 | 0,034 | 0,195 | -0,190 | 0,033 | -0,054 | -0,101 | 0,155 | 0,184 |
| Min. temperature | 0,001 | -0,138 | 0,068 | 0,251 | -0,252 | 0,038 | -0,116 | -0,150 | 0,189 | 0,244 |
| Mean temperature | -0,011 | -0,123 | 0,052 | 0,207 | -0,211 | 0,046 | -0,068 | -0,127 | 0,167 | 0,190 |
| Precipitation [mm] | -0,184 | -0,293 | -0,163 | 0,193 | -0,430* | 0,068 | -0,285 | -0,396* | -0,062 | 0,202 |
| Sunshine [h] | 0,080 | 0,144 | -0,006 | 0,134 | -0,032 | -0,047 | 0,076 | 0,060 | 0,163 | 0,156 |
| Rain [h] | -0,236 | -0,409* | -0,057 | 0,006 | -0,287 | -0,101 | -0,178 | -0,334* | -0,212 | 0,059 |
| Snow [h] | 0,148 | 0,256 | 0,048 | -0,113 | 0,233 | 0,103 | 0,096 | 0,060 | -0,116 | 0,026 |
| Sleet [h] | 0,092 | 0,213 | 0,001 | -0,154 | 0,167 | 0,056 | 0,146 | 0,132 | -0,117 | -0,123 |
| Hail [h] | 0,078 | 0,132 | 0,084 | 0,128 | 0,080 | -0,058 | 0,389* | -0,013 | -0,063 | -0,175 |
| Total precipitation time [h] | -0,135 | -0,256 | -0,100 | -0,066 | -0,133 | 0,043 | -0,169 | -0,184 | -0,186 | 0,049 |
| Fog [h] | 0,059 | -0,027 | 0,139 | 0,027 | 0,050 | 0,126 | 0,065 | 0,004 | -0,085 | 0,057 |
| Mist [h] | -0,006 | -0,057 | 0,078 | -0,162 | 0,116 | 0,094 | -0,067 | 0,069 | 0,011 | -0,019 |
| Haze [h] | 0,361* | 0,384* | 0,301 | 0,068 | 0,384* | 0,055 | 0,410* | 0,475* | -0,197 | -0,112 |
| Wind >15 [m/s] | 0,026 | -0,063 | 0,023 | 0,243 | -0,206 | 0,157 | -0,037 | -0,087 | 0,123 | 0,213 |
| Thunderstorm [h] | 0,356* | 0,395* | 0,259 | 0,146 | 0,286 | 0,291 | 0,177 | 0,273 | 0,218 | 0,357* |
| Lightning [0/1] | -0,094 | -0,192 | -0,047 | -0,073 | -0,066 | 0,071 | -0,180 | -0,099 | -0,158 | -0,077 |
| Average cloud cover [okt] | 0,108 | 0,086 | 0,080 | -0,048 | 0,186 | -0,187 | -0,005 | 0,308 | -0,172 | 0,006 |
| Mean wind [m/s] | 0,102 | 0,151 | 0,145 | 0,074 | 0,074 | -0,226 | 0,124 | 0,364* | -0,037 | -0,022 |
| Station-level pressure [hPa] | 0,131 | 0,179 | 0,175 | 0,044 | 0,138 | -0,205 | 0,163 | 0,387* | -0,054 | -0,048 |

* Statistically significant correlations (p < 0.05)
